# Supplementary material for: Patients’, clinicians’ and the research communities’ priorities for treatment research: there is an important mismatch
Source: PubMed Central journal article supplement (PMC5598091; doi:10.1186/s40900-015-0003-x), 2015-06-25
Supplement: 40900_2015_3_MOESM1_ESM.pdf [file 40900_2015_3_MOESM1_ESM.pdf]

**Additional File 1:****Interventions described in research priorities identified by James Lind Alliance Priority Setting Partnerships and among registered trials, 2003-2012**

|                          | <b>JLA patient-clinician<br/>Priority Setting<br/>Partnerships</b>      | <b>Registered<br/>non-commercial trials</b>                              | <b>Registered<br/>commercial<br/>trials</b>                             |
|--------------------------|-------------------------------------------------------------------------|--------------------------------------------------------------------------|-------------------------------------------------------------------------|
|                          | <b>Percentage</b><br>(N out of total of 126<br>interventions mentioned) | <b>Percentage</b><br>(N out of total of 1069<br>interventions mentioned) | <b>Percentage</b><br>(N out of total of 798<br>interventions mentioned) |
| Drug                     | <b>15.2</b><br>(19)                                                     | <b>34.1</b><br>(364)                                                     | <b>83.8</b><br>(669)                                                    |
| Radiotherapy             | <b>0.7</b><br>(1)                                                       | <b>1.3</b><br>(14)                                                       | <b>0.1</b><br>(1)                                                       |
| Surgery                  | <b>3.1</b><br>(4)                                                       | <b>7.0</b><br>(75)                                                       | <b>2.0</b><br>(16)                                                      |
| Diagnostic               | <b>10.3</b><br>(13)                                                     | <b>8.8</b><br>(94)                                                       | <b>2.6</b><br>(21)                                                      |
| Education and training   | <b>10.3</b><br>(13)                                                     | <b>9.3</b><br>(99)                                                       | <b>0.8</b><br>(6)                                                       |
| Service delivery         | <b>10.3</b><br>(13)                                                     | <b>6.5</b><br>(69)                                                       | <b>0.5</b><br>(4)                                                       |
| Psychological therapy    | <b>7.1</b><br>(9)                                                       | <b>5.7</b><br>(61)                                                       | <b>0.1</b><br>(1)                                                       |
| Vaccines and biologicals | <b>3.1</b><br>(4)                                                       | <b>3.1</b><br>(33)                                                       | <b>2.5</b><br>(20)                                                      |
| Devices                  | <b>8.7</b><br>(11)                                                      | <b>12.7</b><br>(131)                                                     | <b>6.4</b><br>(51)                                                      |
| Physical therapies       | <b>7.1</b><br>(9)                                                       | <b>3.1</b><br>(33)                                                       | <b>0.4</b><br>(3)                                                       |
| Exercise                 | <b>2.3</b><br>(3)                                                       | <b>3.1</b><br>(33)                                                       | <b>0.0</b><br>(0)                                                       |
| Complementary therapies  | <b>2.3</b><br>(3)                                                       | <b>1.1</b><br>(12)                                                       | <b>0.0</b><br>(0)                                                       |
| Social care              | <b>1.5</b><br>(2)                                                       | <b>0.0</b><br>(0)                                                        | <b>0.0</b><br>(0)                                                       |
| Mixed or complex         | <b>2.3</b><br>(3)                                                       | <b>0.0</b><br>(0)                                                        | <b>0.0</b><br>(0)                                                       |
| Diet                     | <b>4.7</b><br>(6)                                                       | <b>3.1</b><br>(33)                                                       | <b>0.8</b><br>(6)                                                       |
| Perioperative            | <b>0.0</b><br>(0)                                                       | <b>1.7</b><br>(18)                                                       | <b>0.0</b><br>(0)                                                       |
| Other                    | <b>10.3</b><br>(13)                                                     | <b>0.0</b><br>(0)                                                        | <b>0.0</b><br>(0)                                                       |
